# Supplementary material for: Differential Disruption of Glucose and Lipid Metabolism Induced by Phthalates in Human Hepatocytes and White Adipocytes
Source: MDPI journal article supplement (doi:10.3390/toxics12030214), 2024-03-14
Supplement: s1 [file s1]

# Supplementary materials

for

## Differential Disruption of Glucose and Lipid Metabolism Induced by Phthalates in Human Hepatocytes and White Adipocytes

Yaru Tian <sup>1,2</sup>, Miao Xu <sup>3</sup>, Hailin Shang <sup>4</sup>, Lijuan You <sup>5</sup>, Jing Yang <sup>5</sup>, Xudong Jia <sup>2</sup>, Hui Yang <sup>2</sup>, Yongning Wu <sup>2,\*</sup>, Xingfen Yang <sup>1,\*</sup> and Yi Wan <sup>4</sup>

- <sup>1</sup> Food Safety and Health Research Center, School of Public Health, Southern Medical University, Guangzhou 510515, China; tianyarusmile@163.com
- <sup>2</sup> NHC Key Laboratory of Food Safety Risk Assessment, China National Center for Food Safety Risk Assessment, Beijing 100021, China; jiaxudong@cfsa.net.cn (X.J.); yanghui@cfsa.net.cn (H.Y.)
- <sup>3</sup> Department of Clinical Nutrition, West China Hospital, Sichuan University, Chengdu 610044, China; xumiao1726@wchscu.cn
- <sup>4</sup> Laboratory for Earth Surface Processes, College of Urban and Environmental Sciences, Peking University, Beijing 100871, China; shanghai@stu.pku.edu.cn (H.S.); wany@urban.pku.edu.cn (Y.W.)
- <sup>5</sup> School of Public Health, Shandong Second Medical University, Weifang 261053, China; 20220846@stu.wfmc.edu.cn (L.Y.); 20220848@stu.wfmc.edu.cn (J.Y.)
- \* Correspondence: wuyongning@cfsa.net.cn (Y.W.); xfyang@vip.163.com (X.Y.)

### Chemicals Information

| Phthalate                  | Abbreviation | CAS number | Cat number |
|----------------------------|--------------|------------|------------|
| Di(2-ethylhexyl) phthalate | DEHP         | 117-81-7   | ALR-097N   |
| Monoethylhexyl phthalate   | MEHP         | 4376-20-9  | ALR-138N   |
| Dicyclohexyl phthalate     | DCHP         | 84-61-7    | ALR-099N   |
| Monocyclohexyl phthalate   | MCHP         | 7517-36-4  | ALR-178N   |

**Table S1.** Chemicals Information

| Regent Information         |             |             |                  |
|----------------------------|-------------|-------------|------------------|
| Regent                     | CAS number  | Cat number  | Brand            |
| Calcium pantothenate       | 137-08-6    | C8731-25G   | Sigma<br>Aldrich |
| Human insulin              | 11061-68-0  | HY-P0035    | MCE              |
| Biotin                     | 58-85-5     | B4639-100mg | Sigma<br>Aldrich |
| Dexamethasone              | 50-02-2     | D4902-25mg  | Sigma<br>Aldrich |
| Indomethacin               | 53-86-1     | I7378-10G   | Sigma<br>Aldrich |
| Isobutylmethylxanthine     | 28822-58-4  | I5879-100mg | Sigma<br>Aldrich |
| 3,3',5-Triiodo-L-thyronine | 6893-02-3   | T2877-100MG | Sigma<br>Aldrich |
| GW6471                     | 880635-03-0 | HY-15372    | MCE              |
| GSK3787                    | 188591-46-0 | HY-15577    | MCE              |
| T0070907                   | 313516-66-4 | 2301        | R&D              |
| Rosiglitazone              | 122320-73-4 | 71740       | Cayman           |

**Table S2.** Regent Information

## AMPK signaling pathway

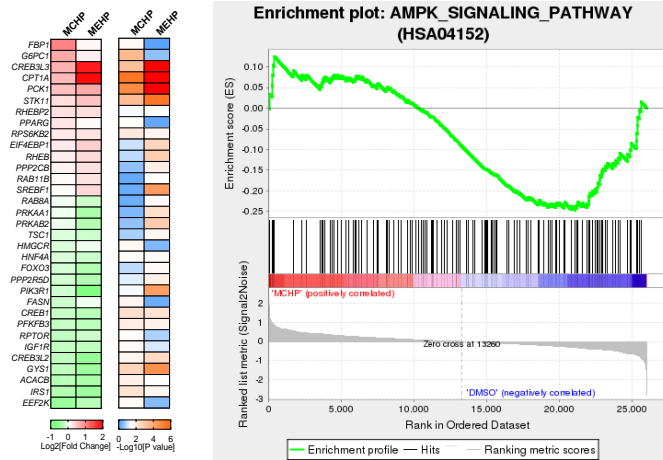

**Figure S1.** DEGs and GSEA of AMPK signaling pathway.

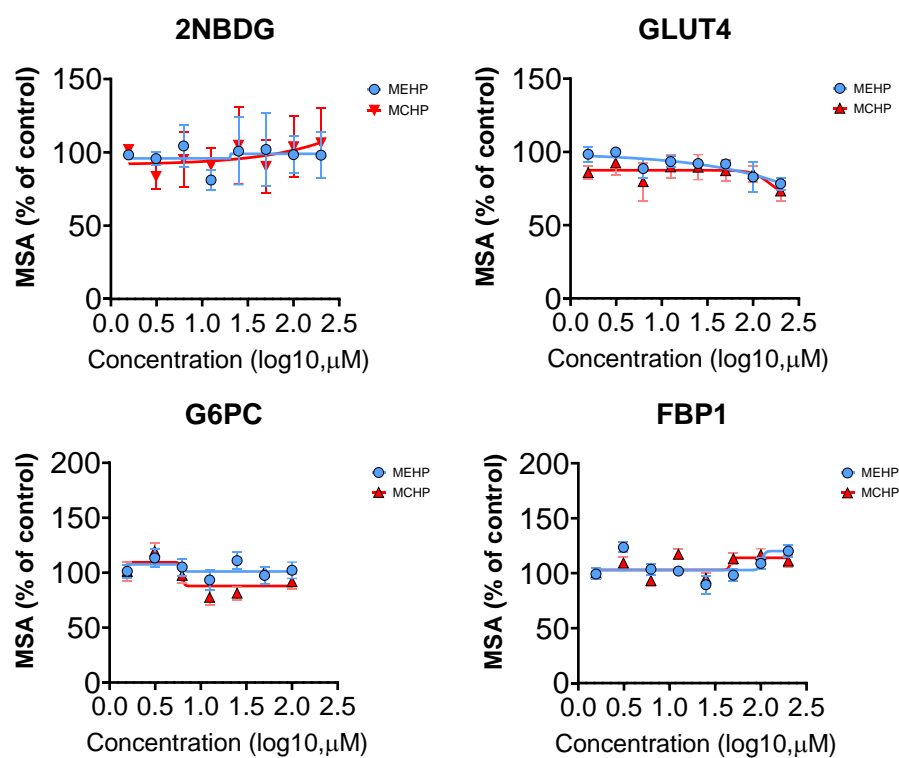

**Figure S2.** The effects of MEHP and MCHP on glucose metabolism in MA cells.
